# Supplementary material
Source: PubMed Central journal article supplement (PMC2756409)
Supplement: NIHMS140850-supplement-supple.pdf [file NIHMS140850-supplement-supple.pdf]

## Supplementary Appendix

This appendix has been provided by the authors to give readers additional information about their work.

Supplement to: Vernes SC, Newbury DF, Abrahams BS, et al. A functional genetic link between distinct developmental language disorders. *N Engl J Med* 2008;359:2337-45. DOI: [10.1056/NEJMoa0802828](https://doi.org/10.1056/NEJMoa0802828).

## **SUPPLEMENTARY METHODS**

### **Cell culture and reagents**

The human SH-SY5Y cell-line, a commonly used cellular model for neuronal function, was employed for chromatin immunoprecipitation and expression analyses. This cell-line was successfully used in earlier functional analyses of FOXP2.<sup>1</sup> SH-SY5Y cells were stably transfected with the pcDNA3.1/FOXP2 vector (which carries the major isoform of FOXP2; isoform I) or the empty vector, as described.<sup>2</sup> HEK293T cells were employed to generate protein for electrophoretic mobility shift assays (EMSAs).<sup>1</sup> FOXP2 protein was detected using a commercially available goat polyclonal antibody (Santa Cruz Biotechnology).

### **Chromatin Immunoprecipitation (ChIP)**

ChIP was carried out using SH-SY5Y cells stably expressing FOXP2 isoform I, as described.<sup>2</sup> Purified chromatin was amplified via Ligation Mediated PCR (LMPCR) according to published protocols.<sup>3</sup>

### **Shotgun cloning of ChIP DNA**

ChIP DNA, amplified via LMPCR, was cloned into pGEM-T Vectors (Promega) and a library of clones was constructed. Clones were directly sequenced using T7 and SP6 primers via Big Dye chemistry on the ABI3700 automated capillary sequencer. The position of ChIP-isolated DNA sequences in the human genome was determined using the BLAT program (<http://genome.ucsc.edu/>) on the UCSC Genome Bioinformatics Server (May 2004 human genome assembly).<sup>4</sup>

**Semi-quantitative PCR**

DNA isolated during CHIP was amplified using a semi-quantitative PCR technique, as described previously.<sup>2</sup> Primer sequences are given in Supplementary Table S1.

**EMSA**

DNA binding was assessed using EMSAs according to published protocols.<sup>2</sup> Probes were designed as oligomers, 24-29 nucleotides in length (Consensus: 5'-AGCTTTATTTATGTTGTTTTGTAT-3', CNTNAP: 5'-AGCTGCTTTCAAATTTAAGCAATCAAGTG-3', CNTNAP-b: 5'-AGCTTTCCCAAATTGTCTTCATTTACATT-3'). When an unlabelled competitor probe (CNTNAP-M: 5'-AGCTGCTTTCGGGTTTAAGCAATCAAGTG-3', NFK: 5'-AGCTCCGGGGGTGATTTCACTCCCCG-3') was used to confirm specificity of DNA binding, it was added in 1-fold, 5-fold or 10-fold excess and incubated at room temperature for 15 minutes before addition of labelled probe.

**Quantitative RT-PCR**

RNA was extracted from SH-SY5Y cells transfected with either FOXP2 or the empty control vector as described previously.<sup>2</sup> For stable transfectants multiple independent passages of a single clone were used. Reverse transcription and PCR amplification was performed as described.<sup>2</sup> Primers were designed using PrimerBank<sup>5</sup> and sequences are given in Table S1. Data analysis was performed with iCycler software (BioRad), followed by quantification using the comparative CT method.<sup>6</sup> Fold changes are reported in response to FOXP2 expression compared to control cells transfected with empty vector, following normalisation to the *GAPDH* internal control. Statistical significance was assessed using unpaired t-tests (two-tailed).

***In situ* hybridisations**

Isotope-based *in situ* hybridisation was performed as described<sup>7</sup> on human foetal brains obtained from the University of Maryland Brain and Tissue Bank under an approved UCLA IRB protocol. Emulsions were imaged using a Nikon Eclipse E600 Microscope with a digital capture system built around a spot cooled CCD camera. Probes employed for *FOXP2* (2210–2462 bp of NM\_148900.1) and *CNTNAP2* (550–4300 bp of NM\_014141.1) were previously reported.<sup>8, 9</sup> All hybridisations were performed on adjacent sections from at least three separate brains. Sense controls showed no signal (data not shown).

**Participants**

The collection and phenotypic characterisation of the SLIC cohort has been described in detail.<sup>10, 11</sup> As noted in the main text, the cohort includes epidemiologically and clinically selected families from four UK sites,<sup>10-14</sup> ascertained through a proband whose past or current language skills (expressive and/or receptive) was  $\geq 1.5SD$  below the normative mean for his/her age. Diagnosis was made using the Clinical Evaluation of Language Fundamentals (CELF-R)<sup>15</sup> diagnostic tool. The battery is split into receptive and expressive scales, consisting of several subtests; the combination of individual tests that are used is dependent on the subject's age at testing. Additive raw scores are transformed to derive a standardized receptive (RLS) and expressive language score (ELS), each with a mean of 100 and a SD of 15 in the general population calibration sample. The majority of the SLIC probands (65%) were ascertained from a clinical setting and thus can be considered to represent a self-referred sample of children with persistent language difficulties. Many require continued learning support or specialist schooling and thus represent the more severe end of the SLI continuum. Nonetheless,

as detailed in the main text, all children in the study had a non-verbal IQ exceeding 80 and no evidence of autism, hearing loss, dyspraxia or cleft lip/palate.

Consistent with previous work,<sup>10, 11</sup> we employed a quantitative approach using phenotypic data collected from all siblings regardless of SLI status. This included the standardised ELS and RLS scores, but also performance on a nonsense-word repetition task (NWR), well established in prior studies as a core endophenotype of SLI.<sup>16-18</sup> In this task, subjects are asked to repeat tape-recorded pronounceable nonsense words of increasing length and complexity (e.g. “brufid” and “contramponist”). NWR performance is highly heritable, and children with current language impairments perform poorly on this test, as do individuals who have had language difficulties in early childhood that later resolved.<sup>16-18</sup> Means, standard deviations and inter-trait correlations for the language measures in the cohort used in this study are shown in Table S2.

### **Single nucleotide polymorphism (SNP) genotyping**

To specifically test the hypothesis that our identified FOXP2 target (the *CNTNAP2* gene) might be implicated in language deficits in the SLIC cohort, we genotyped 38 SNPs across the *CNTNAP2* locus on chromosome 7q35. For practical reasons these SNPs were genotyped on a Golden Gate 1536-SNP array (Illumina),<sup>19</sup> which primarily consisted of unrelated SNPs from chromosome 16. These unrelated SNPs were part of an ongoing positional-cloning effort to identify the gene underlying a previously identified chromosome-16 linkage<sup>10, 11</sup> and are independent of the present study. To facilitate verification of genotype quality, 2 CEPH samples were included in the plates and 10 family samples were duplicated across plates. In addition, 10 SNPs that had previously been genotyped in these families were included on the array. The call mismatch rate

across all SNPs was 0.76% for the CEPH and duplicated samples, and 0.73% for duplicated SNPs. Genotypes were uploaded into the Integrated Genotyping System<sup>20</sup> and checked for pedigree inconsistencies and Hardy Weinberg Equilibrium (HWE) prior to analysis. SNPs or pedigrees with >1% inconsistencies or a HWE probability of below 0.001 were removed. In addition, haplotypes were created within Merlin<sup>21</sup> and those with a HWE P-value of <0.01 were re-examined at the call level and corrected if necessary. Any genotypes with a  $P < 0.001$  that could not be corrected were deleted. The final dataset included validated data from 38 SNPs in 847 individuals from 184 SLIC families (minimum genotyping rate of 83%; average success rate of 91%).

### **Quantitative association analyses**

Given that the SLIC cohort comprised families that were ascertained and assessed by different teams spread across the UK, we carried out quantitative family-based association analyses using the orthogonal association model within the QTDT package.<sup>22</sup> This option considers only the within-family variance and is therefore robust to biases caused by population stratification. Haplotype generation was performed within Merlin<sup>21</sup> using the --best option and was successful for 81% of genotyped individuals. Following our identification of significant association, the possibility of a sex or imprinting effect was investigated within QTDT using nine-SNP-tag haplotypes with sex as a covariate (-cs option) and by testing for differences in the transmission of paternal and maternal alleles (-ot option).

**SUPPLEMENTARY TABLES****Table S1. Oligonucleotide primers used for semi-quantitative ChIP-PCR and expression analyses (qRT-PCR)**

| <b>Method</b> | <b>Gene</b> | <b>Forward primer (5'-to-3')</b> | <b>Reverse primer (5'-to-3')</b> |
|---------------|-------------|----------------------------------|----------------------------------|
| qPCR          | CNTNAP2-P1  | GGAAGCAGAGACCACTCCAG             | ACTCAGGCCAGTTCTCTCCA             |
|               | CNTNAP2-P2  | ATGGAGAGAACTGGCCTGAG             | AATAAGTCATGGCGCATTCA             |
|               | CNTNAP2-P3  | TTCCTGCTTCCCAAATTGTC             | AAAAGCAAGGGTGAATGGAA             |
| qRT-PCR       | CNTNAP2_A   | TCCCTCCACGTCCCAAAAATG            | TCTTGGCATAGCCGGGAGAA             |
|               | CNTNAP2_B   | TCCCGGCTATGCCAAGATAAA            | TTCCGATTGCCAAAGTCAACC            |
|               | CNTNAP2_C   | TGACTTTGGCAATCGGAAGCA            | CCTGTGTCGCTGTAGAGCAT             |
|               | FOXP2       | CCTTCAGCGTCAGGGACTCA             | CACTTCTTTCCATAACTGCTGAATCTC      |
|               | GAPDH       | CAGTCCATGCCATCACTGC              | TTCGTTGTCATACCAGGAAATG           |

**Table S2A. Descriptive statistics for quantitative phenotypes in SLIC probands, and available siblings, genotyped in this study.**

| <b>Group</b>    | <b>Statistic</b>     | <b>ELS</b> | <b>RLS</b> | <b>NWR</b> |
|-----------------|----------------------|------------|------------|------------|
| <b>All</b>      | <b>Mean</b>          | 78.60      | 88.39      | 91.75      |
|                 | <b>Std Error</b>     | 0.78       | 0.90       | 0.93       |
|                 | <b>Std Deviation</b> | 15.72      | 18.17      | 19.97      |
|                 | <b>Count</b>         | 405        | 405        | 464        |
| <b>Probands</b> | <b>Mean</b>          | 71.96      | 81.92      | 85.83      |
|                 | <b>Std Error</b>     | 1.08       | 1.26       | 1.59       |
|                 | <b>Std Deviation</b> | 14.38      | 16.73      | 21.53      |
|                 | <b>Count</b>         | 176        | 177        | 183        |
| <b>Siblings</b> | <b>Mean</b>          | 83.69      | 93.41      | 95.60      |
|                 | <b>Std Error</b>     | 0.98       | 1.17       | 1.07       |
|                 | <b>Std Deviation</b> | 14.79      | 17.68      | 17.90      |
|                 | <b>Count</b>         | 229        | 228        | 281        |

Note: All traits have a mean of 100 and a standard deviation of 15 in the normal population. 81 of the 229 siblings with available data (35.4%) were also affected under the SLIC criteria of  $\geq 1.5SD$  below the mean on ELS or RLS. In a small number of cases of severe SLI, probands were unable to complete all subtests of the CELF, and so their full ELS and RLS scores could not be calculated.

**Table S2B. Correlations between phenotypes in the SLIC sample genotyped in this study.**

|            | <b>ELS</b> | <b>RLS</b> | <b>NWR</b> |
|------------|------------|------------|------------|
| <b>ELS</b> | 1.000      |            |            |
| <b>RLS</b> | 0.788      | 1.000      |            |
| <b>NWR</b> | 0.566      | 0.499      | 1.000      |



**Table S3. Quantitative association analyses of SNPs in the CNTNAP2 gene in children with SLI.**

| Marker     | Start (bp) | End (bp)  | SNP | MAF   | NWR            |        | ELS          |        | RLS          |        |
|------------|------------|-----------|-----|-------|----------------|--------|--------------|--------|--------------|--------|
|            |            |           |     |       | P-value        | Effect | P-value      | Effect | P-value      | Effect |
| Exon 1     | 145251477  | 145251713 |     |       |                |        |              |        |              |        |
| rs7806058  | 145445440  |           | A/G | 0.655 | 0.998          | 0.98   | 0.886        | 0.42   | 0.257        | 1.73   |
| rs6946112  | 145496865  |           | C/T | 0.713 | 0.375          | 1.69   | 0.870        | 1.10   | 0.905        | 1.35   |
| rs12703803 | 145500557  |           | T/G | 0.708 | 0.434          | 2.01   | 0.813        | 1.08   | 0.779        | 1.69   |
| rs2058377  | 145527718  |           | A/G | 0.684 | 0.433          | 2.08   | 0.820        | 0.76   | 0.971        | 1.44   |
| rs12667234 | 145548824  |           | A/G | 0.697 | 0.296          | 2.46   | 0.680        | 1.55   | 0.870        | 1.61   |
| rs2888335  | 145562222  |           | T/C | 0.674 | 0.402          | 2.21   | 0.883        | 1.17   | 0.977        | 1.39   |
| rs7805539  | 145597926  |           | G/A | 0.714 | 0.500          | 2.22   | 0.734        | 1.27   | 0.818        | 1.46   |
| rs4726793  | 145714538  |           | A/G | 0.796 | 0.497          | 2.31   | 0.999        | 1.62   | 0.352        | 2.55   |
| rs2191295  | 145715642  |           | A/G | 0.795 | 0.343          | 2.31   | 0.751        | 1.62   | 0.241        | 2.54   |
| rs10277654 | 145790224  |           | T/C | 0.571 | 0.546          | 1.09   | 0.884        | 1.06   | 0.338        | 2.16   |
| Exon 2     | 145909011  | 145909121 |     |       |                |        |              |        |              |        |
| rs7794745  | 145927254  |           | A/T | 0.669 | 0.934          | 0.89   | 0.540        | 1.66   | 0.790        | 1.84   |
| Exon 3     | 145974451  | 145974644 |     |       |                |        |              |        |              |        |
| rs17170287 | 146015977  |           | T/G | 0.755 | 0.475          | 0.55   | 0.294        | 1.40   | 0.686        | 1.66   |
| rs6945085  | 146128868  |           | T/C | 0.916 | 0.519          | 2.73   | 0.197        | 3.99   | 0.080        | 7.98   |
| rs4725699  | 146136016  |           | C/T | 0.952 | 0.164          | 9.08   | 0.665        | 3.56   | 0.569        | 1.05   |
| rs1024676  | 146153509  |           | C/T | 0.580 | 0.524          | 0.96   | 0.649        | 0.55   | 0.833        | 1.33   |
| rs10282158 | 146175715  |           | T/A | 0.953 | 0.095          | 10.24  | 0.578        | 3.52   | 0.502        | 0.99   |
| rs7812091  | 146178225  |           | T/C | 0.569 | 0.495          | 0.86   | 0.503        | 0.51   | 0.719        | 1.34   |
| Exon 4     | 146178647  | 146178794 |     |       |                |        |              |        |              |        |
| rs6975159  | 146204462  |           | T/C | 0.686 | 0.842          | 0.47   | 0.796        | 0.66   | 0.529        | 1.16   |
| Exon 5     | 146242887  | 146243090 |     |       |                |        |              |        |              |        |
| Exon 6     | 146255719  | 146255903 |     |       |                |        |              |        |              |        |
| Exon 7     | 146263433  | 146263576 |     |       |                |        |              |        |              |        |
| Exon 8     | 146266985  | 146267249 |     |       |                |        |              |        |              |        |
| rs10500170 | 146285899  |           | A/G | 0.833 | 0.829          | 2.65   | 0.715        | 1.21   | 0.683        | 1.78   |
| rs1603453  | 146346567  |           | T/A | 0.882 | 0.177          | 3.86   | 0.588        | 3.14   | 0.309        | 4.40   |
| rs1603450  | 146351188  |           | G/A | 0.855 | 0.192          | 3.92   | 0.423        | 1.21   | 0.654        | 1.41   |
| Exon 9     | 146434881  | 146435030 |     |       |                |        |              |        |              |        |
| Exon 10    | 146530349  | 146530520 |     |       |                |        |              |        |              |        |
| rs10251377 | 146555102  |           | A/G | 0.770 | 0.308          | 2.13   | 0.635        | 0.69   | 0.665        | 0.02   |
| Exon 11    | 146620675  | 146620781 |     |       |                |        |              |        |              |        |
| Exon 12    | 146696878  | 146696997 |     |       |                |        |              |        |              |        |
| Exon 13    | 146773846  | 146774046 |     |       |                |        |              |        |              |        |
| rs851715   | 146964554  |           | A/G | 0.687 | <b>0.002</b>   | 4.54   | 0.085        | 2.96   | 0.046        | 3.89   |
| rs1177007  | 146984019  |           | A/G | 0.675 | 0.087          | 5.25   | 0.727        | 3.73   | 0.520        | 4.40   |
| rs1186173  | 146984251  |           | C/T | 0.669 | 0.016          | 3.93   | 0.069        | 3.29   | 0.038        | 4.25   |
| rs10246256 | 146992455  |           | T/C | 0.683 | <b>0.001</b>   | 4.89   | 0.032        | 3.29   | 0.027        | 4.13   |
| rs2710102  | 147012038  |           | C/T | 0.517 | <b>0.002</b>   | 4.26   | 0.143        | 2.40   | 0.074        | 2.54   |
| rs759178   | 147012760  |           | G/T | 0.518 | <b>0.002</b>   | 4.36   | 0.169        | 2.50   | 0.065        | 2.62   |
| rs1922892  | 147014059  |           | T/C | 0.518 | <b>0.002</b>   | 4.38   | 0.114        | 2.50   | 0.053        | 2.63   |
| rs2538991  | 147017267  |           | C/A | 0.515 | <b>0.002</b>   | 4.60   | 0.116        | 2.47   | 0.062        | 2.79   |
| rs17236239 | 147019953  |           | A/G | 0.654 | <b>0.00005</b> | 5.53   | <b>0.008</b> | 3.21   | 0.015        | 2.95   |
| rs2538976  | 147023467  |           | G/A | 0.511 | <b>0.002</b>   | 4.38   | 0.100        | 2.37   | 0.061        | 2.60   |
| rs4431523  | 147034814  |           | A/G | 0.692 | 0.014          | 2.88   | 0.036        | 2.42   | <b>0.003</b> | 3.37   |
| rs2538963  | 147037094  |           | G/T | 0.625 | 0.517          | 0.99   | 0.714        | 0.34   | 0.602        | 0.57   |
| Exon 14    | 147038305  | 147038461 |     |       |                |        |              |        |              |        |
| rs2710117  | 147039420  |           | A/T | 0.653 | <b>0.0004</b>  | 4.53   | 0.033        | 2.77   | 0.019        | 3.79   |

**Table S3 (continued).**

| Marker     | Start (bp) | End (bp)  | SNP | MAF   | NWR     |        | ELS     |        | RLS     |        |
|------------|------------|-----------|-----|-------|---------|--------|---------|--------|---------|--------|
|            |            |           |     |       | P-value | Effect | P-value | Effect | P-value | Effect |
| Exon 15    | 147112602  | 147112729 |     |       |         |        |         |        |         |        |
| rs10240503 | 147112626  |           | A/G | 0.889 | 0.662   | 0.92   | 0.492   | 1.80   | 0.231   | 2.40   |
| Exon 16    | 147252858  | 147253028 |     |       |         |        |         |        |         |        |
| Exon 17    | 147282231  | 147282449 |     |       |         |        |         |        |         |        |
| rs12155129 | 147294513  |           | A/G | 0.897 | 0.710   | 0.81   | 0.377   | 0.27   | 0.182   | 0.41   |
| Exon 18    | 147306982  | 147307218 |     |       |         |        |         |        |         |        |
| Exon 19    | 147352028  | 147352264 |     |       |         |        |         |        |         |        |
| Exon 20    | 147364386  | 147364519 |     |       |         |        |         |        |         |        |
| rs11980146 | 147394381  |           | A/G | 0.680 | 0.993   | 0.93   | 0.337   | 1.11   | 0.260   | 0.85   |
| Exon 21    | 147401773  | 147401866 |     |       |         |        |         |        |         |        |
| Exon 22    | 147518389  | 147518628 |     |       |         |        |         |        |         |        |
| Exon 23    | 147544131  | 147544211 |     |       |         |        |         |        |         |        |
| Exon 24    | 147550157  | 147555734 |     |       |         |        |         |        |         |        |

Note: Positions of *CNTNAP2* exons and SNP markers with respect to genomic sequence are given in the lefthand columns. The **SNP** column gives the two possible alleles for the typed SNP, with the major allele stated first. Where appropriate, the putative risk allele is highlighted in red. For all SNPs, the identified risk allele was consistent across all traits. **MAF** indicates the major allele frequency in the SLIC families tested. The **P-value** column gives the p-value for association between the given SNP and phenotype within an orthogonal QTDT model. The most significant P-values (those that are <0.01) are indicated in red. There are clusters of SNPs with P-values <0.05 in the exon 13-15 region for all three phenotypes, with NWR showing the highest significance. **Effect** denotes the effect size of the major allele upon the trait (e.g. it is estimated that each risk allele of rs17236239 carried confers a 5.53 drop in the NWR score, a 3.21 drop in the ELS score, and a 2.95 drop in the RLS score).

**Table S4. QTDT analyses of 9-snp haplotypes**

| Allele              | Haplotype | Frequency | NWR    | ELS    | RLS    |
|---------------------|-----------|-----------|--------|--------|--------|
| <b>1</b>            | ATCGTCGGA | 0.353     | 0.0006 | 0.0686 | 0.0457 |
| <b>2</b>            | GCTTCAAAT | 0.285     | 0.0155 | 0.2279 | 0.0467 |
| <b>3</b>            | ATCGTCAGA | 0.169     | 0.2499 | 0.411  | 0.4149 |
| <b>4</b>            | ATTTCAAAA | 0.129     | 0.3627 | 0.2395 | 0.2477 |
| <b>5</b>            | ATTTCAAAT | 0.045     | 0.0219 | 0.1466 | 0.5449 |
| <b>rare alleles</b> |           | 0.021     | NT     | NT     | NT     |

Note: Frequency of MERLIN-constructed haplotypes for the 9 SNPs that showed single-SNP NWR associations at P<0.01 (rs851715, rs10246256, rs2710102, rs759178, rs1922892, rs2538991, rs17236239, rs2538976, & rs2710117). See Table S3 for information on individual SNPs. Note that the alleles which make up the significantly associated haplotype *ht1* are identical to the putative NWR risk alleles identified in the single-SNP analyses of these markers (Table S3). P-values are given for association between the trait shown and the marker haplotype, obtained from QTDT using an orthogonal model.

## SUPPLEMENTARY REFERENCES

1. Vernes SC, Nicod J, Elahi FM, et al. Functional genetic analysis of mutations implicated in a human speech and language disorder. *Hum Mol Genet* 2006;15(21):3154-67.
2. Vernes SC, Spiteri E, Nicod J, et al. High-throughput analysis of promoter occupancy reveals direct neural targets of FOXP2, a gene mutated in speech and language disorders. *Am J Hum Genet* 2007;81(6):1232-50.
3. Oberley MJ, Farnham PJ. Probing chromatin immunoprecipitates with CpG-island microarrays to identify genomic sites occupied by DNA-binding proteins. *Methods Enzymol* 2003;371:577-96.
4. Karolchik D, Baertsch R, Diekhans M, et al. The UCSC Genome Browser Database. *Nucleic Acids Res* 2003;31(1):51-4.
5. Wang X, Seed B. A PCR primer bank for quantitative gene expression analysis. *Nucleic Acids Res* 2003;31(24):e154.
6. Livak KJ, Schmittgen TD. Analysis of relative gene expression data using real-time quantitative PCR and the 2<sup>-Delta Delta C(T)</sup> Method. *Methods* 2001;25(4):402-8.
7. Abu-Khalil A, Fu L, Grove EA, Zecevic N, Geschwind DH. Wnt genes define distinct boundaries in the developing human brain: implications for human forebrain patterning. *J Comp Neurol* 2004;474(2):276-88.
8. Teramitsu I, Kudo LC, London SE, Geschwind DH, White SA. Parallel FoxP1 and FoxP2 expression in songbird and human brain predicts functional interaction. *J Neurosci* 2004;24(13):3152-63.

9. Abrahams BS, Tontler D, Perederiy JV, Oldham MC, Coppola G, Geschwind DH. Genome-wide analyses of human perisylvian cerebral cortical patterning. *Proc Natl Acad Sci U S A* 2007;104(45):17849-54.
10. The SLI Consortium. A genomewide scan identifies two novel loci involved in specific language impairment. *Am J Hum Genet* 2002;70(2):384-98.
11. The SLI Consortium. Highly significant linkage to the SLI1 locus in an expanded sample of individuals affected by specific language impairment. *Am J Hum Genet* 2004;74(6):1225-38.
12. Burden V, Stott CM, Forge J, Goodyer I. The Cambridge Language and Speech Project (CLASP). I .Detection of language difficulties at 36 to 39 months. *Dev Med Child Neurol* 1996;38(7):613-31.
13. Clark A, O'Hare A, Watson J, et al. Severe receptive language disorder in childhood--familial aspects and long-term outcomes: results from a Scottish study. *Arch Dis Child* 2007;92(7):614-9.
14. Conti-Ramsden G, Botting N. Characteristics of children attending language units in England: a national study of 7-year-olds. *Int J Lang Commun Disord* 1999;34(4):359-66.
15. Semel EM, Wiig EH, Secord W. *Clinical Evaluation of Language Fundamentals - Revised*. San Antonio, Texas: Psychological Corporation; 1992.
16. Gathercole SE, Willis CS, Baddeley AD, Emslie H. The Children's Test of Nonword Repetition: a test of phonological working memory. *Memory* 1994;2(2):103-27.
17. Bishop DV, North T, Donlan C. Nonword repetition as a behavioural marker for inherited language impairment: evidence from a twin study. *J Child Psychol Psychiatry* 1996;37(4):391-403.

18. Newbury DF, Bishop DV, Monaco AP. Genetic influences on language impairment and phonological short-term memory. *Trends Cogn Sci* 2005;9(11):528-34.
19. Fan JB, Oliphant A, Shen R, et al. Highly parallel SNP genotyping. *Cold Spring Harb Symp Quant Biol* 2003;68:69-78.
20. Fiddy S, Cattermole D, Xie D, Duan XY, Mott R. An integrated system for genetic analysis. *BMC Bioinformatics* 2006;7:210.
21. Abecasis GR, Cherny SS, Cookson WO, Cardon LR. Merlin--rapid analysis of dense genetic maps using sparse gene flow trees. *Nat Genet* 2002;30(1):97-101.
22. Abecasis GR, Cardon LR, Cookson WO. A general test of association for quantitative traits in nuclear families. *Am J Hum Genet* 2000;66(1):279-92.
